# Supplementary material for: The burden of laboratory-confirmed pertussis in low- and middle-income countries since the inception of the Expanded Programme on Immunisation (EPI) in 1974: a systematic review and meta-analysis
Source: PubMed Central journal article supplement (PMC7453720; doi:10.1186/s12916-020-01699-3), 2020-08-28

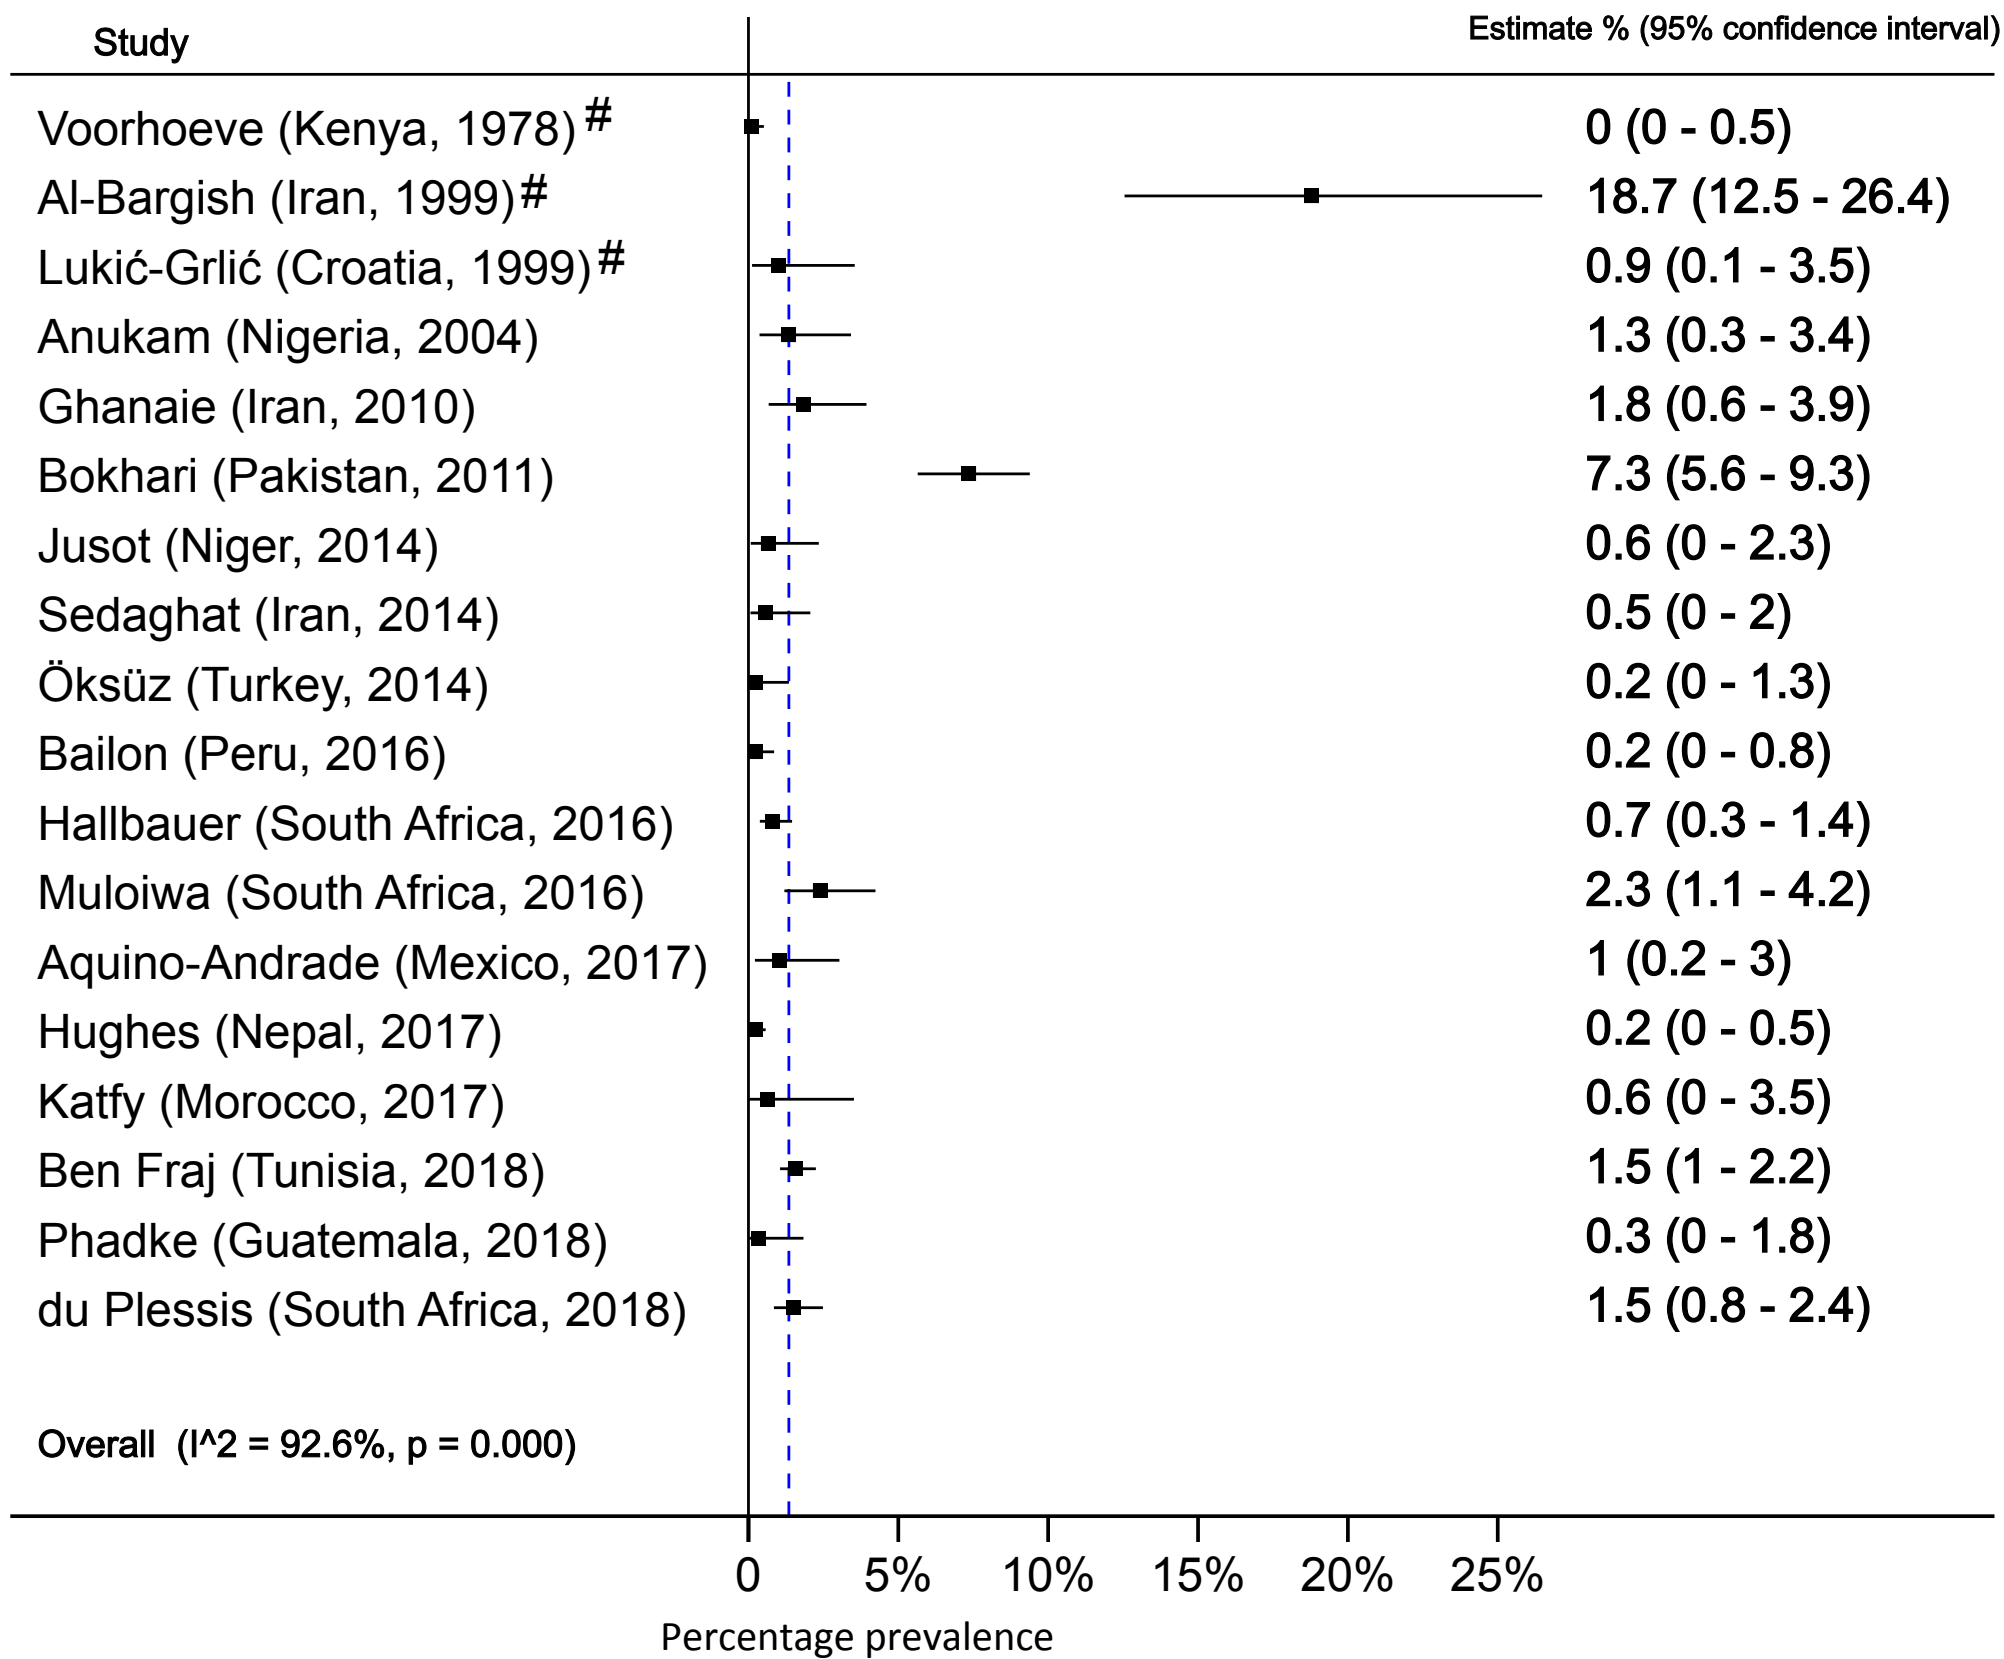

Supplement: 12916_2020_1699_MOESM5_ESM.pdf [file 12916_2020_1699_MOESM5_ESM.pdf]
